# Supplementary material
Source: PubMed Central journal article supplement (PMC5957542)
Supplement: NIHMS965882-supplement-Supplemental_data.pdf [file NIHMS965882-supplement-Supplemental_data.pdf]

1 **Inline Supplementary Figures**

2

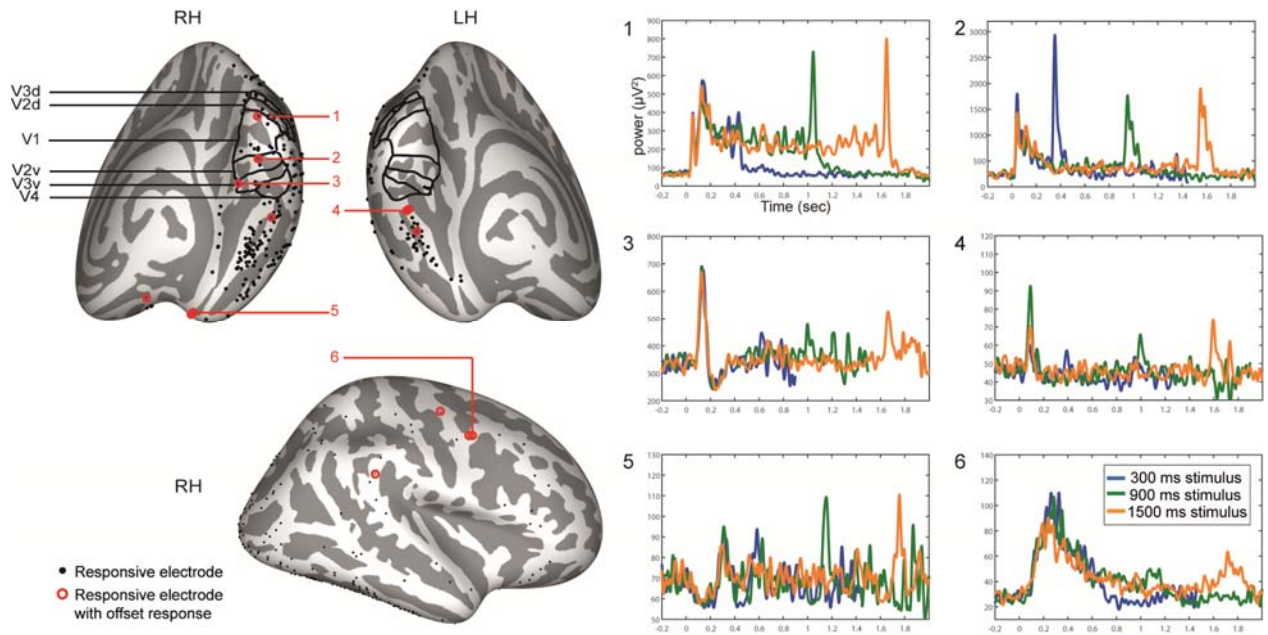

3

4 **Figure S1: Responses to stimulus offset:** Offset responses were found in 14 of the 292 responsive electrodes. Offset  
5 responses were detected based on a HFB power increase in the 300 ms post-stimulus time window compared to the  
6 preceding 300 ms window, as assessed by a cluster-based permutation test (Maris and Oostenveld, 2007). False-Detection  
7 Rate correction was applied ( $q=0.05$ ) to define significant offset responses across all responsive electrodes. Offset  
8 responses were rare but not confined to a particular cortical region, and did not necessarily co-occur with sustained  
9 responses (compare for example electrodes 1 and 2). Left panel: electrodes with significant offset responses across all  
10 subjects and hemispheres. Right panel: examples for offset responses from the six numbered electrodes on the left panel.

11

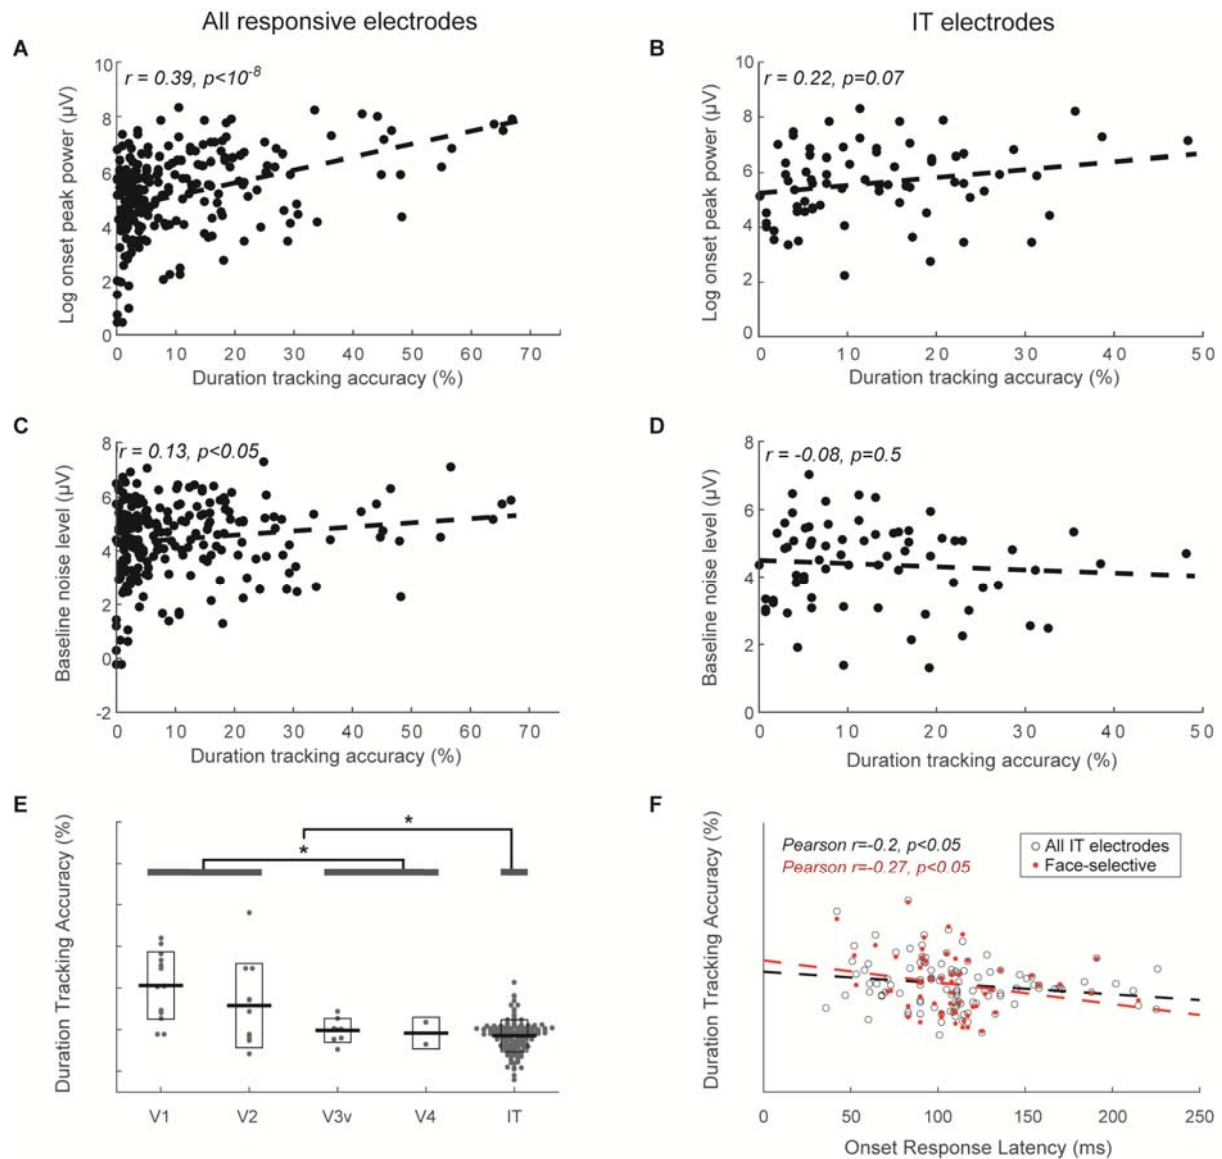

12

13 **Figure S2: Controlling for baseline noise level and onset peak power.** (A, B) the signal-to-noise ratio (SNR) of each  
 14 electrodes' HFB onset response, measured as the log of the ratio between the peak power of the 0-300 ms epoch in the  
 15 average response for the preferred stimulus category (or for all categories for non-selective electrodes) and the standard  
 16 deviation of the baseline, is correlated with duration-tracking accuracy across all right-hemisphere visually-responsive  
 17 electrodes and across IT electrodes. (C,D) the baseline noise level for each electrode, measured as the log of the standard  
 18 deviation of the baseline HFB power, is also mildly correlated with accuracy. Despite their correlation with duration-  
 19 tracking accuracy, onset SNR and baseline noise level factors do not explain the negative correlation between duration-  
 20 tracking accuracy and hierarchical position along the ventral stream. This was verified by regressing out the variance in  
 21 the accuracy variable explained by these two factors using multiple regression, and analyzing the residual variance. As in  
 22 the original analysis, accuracy was higher in EVC areas than in IT ( $t(166)=7.2, p < 10^{-5}$ ), and in V1/V2 than V3v/V4  
 23 ( $t(32)=2.9, p < 0.01$ ; panel (E), compare to Fig 1C), and within inferior temporal electrodes duration accuracy inversely  
 24 correlated with response latency (panel (F), compare to Fig 1D). Correlating accuracy with position along the posterior-

25 anterior axis produced comparable results ( $r=-0.31$ ,  $p<0.01$  for all IT electrodes,  $r=-0.36$ ,  $p<0.01$  for face-selective  
 26 electrodes).

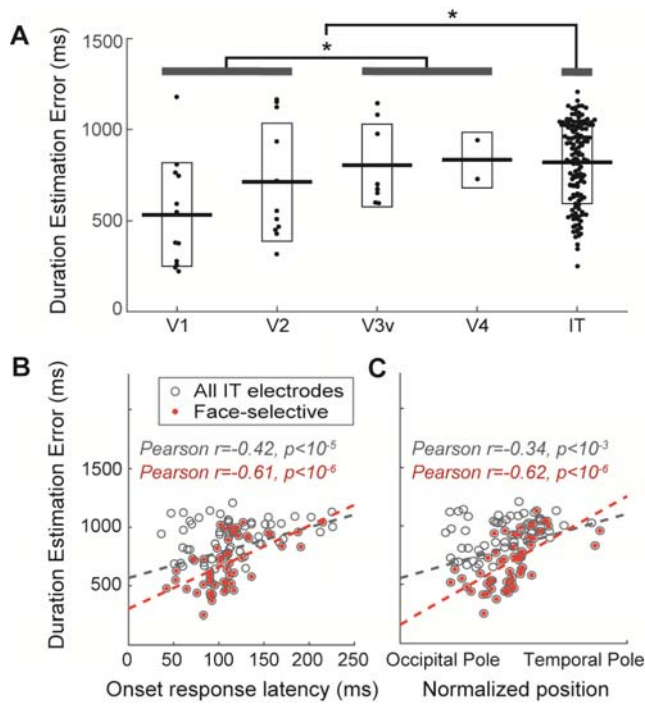

27

28 **Figure S3. Duration tracking estimation error.** To verify that the effects reported for duration-tracking accuracy were  
 29 not dependent on the particular accuracy metric used, the same results reported in Fig 1 were replicated using the mean  
 30 duration estimation error as the dependent variable. **(A)** Relation between duration estimation error and hierarchical  
 31 position along the ventral stream, based on a probabilistic atlas (EVC areas) and visual inspection (IT). Boxes correspond  
 32 to standard deviation. Error in EVC areas is lower than in IT ( $t(166)=-3.2$ ,  $p<0.01$ ), and in V1/V2 compared to V3v/V4  
 33 ( $t(32)=-1.82$ ,  $p<0.05$ ). **(B)** duration-tracking within IT as a function of onset response latency as a proxy for hierarchical  
 34 position along the ventral stream. **(C)** Same as (B), with hierarchical position measured as the electrode's coordinate along  
 35 the occipital-temporal axis.

36

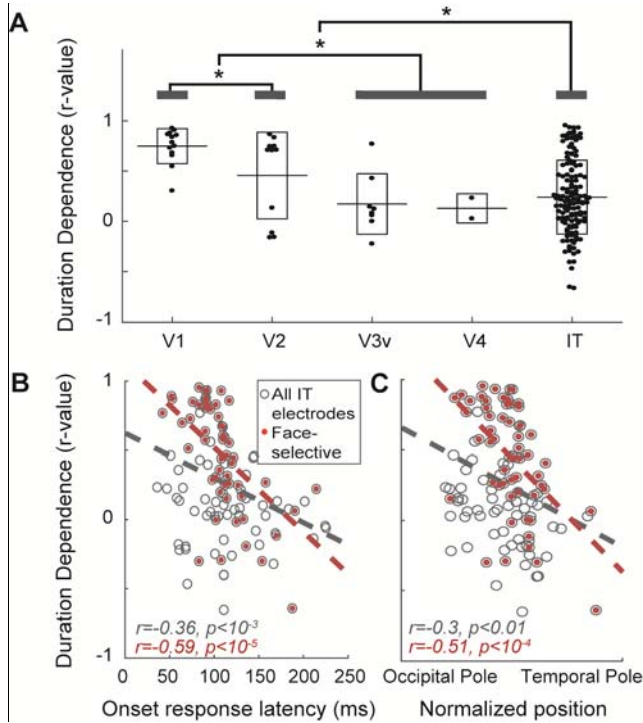

37

38 **Figure S4. Decreasing duration dependence along the ventral stream.** (A) The duration-dependence index (i.e., the  
 39 correlation across trials between number of post-stimulus above-baseline time points and stimulus duration) as a function  
 40 of region, plotted for all visually-responsive electrodes. Boxes indicate standard deviation. Duration dependence is higher  
 41 in EVC areas than in IT ( $t(166)=3.4, p<10^{-3}$ ), in V1/V2 than in V3v/V4 ( $t(32)=3.68, p<10^{-3}$ ), and in V1 than in V2  
 42 ( $t(22)=2.25, p<0.05$ ). (B) Duration dependence within IT as a function of onset response latency. (C) Duration  
 43 dependence within IT as a function of anatomical position along the posterior-anterior axis.

44

45
